# Supplementary material for: Synthetic ozone deposition and stomatal uptake at flux tower sites
Source: Copernicus journal article supplement (doi:10.5194/bg-2018-172), 2018-04-18
Supplement: Supplementary file 1 [file bg-2018-172-supplement.zip]

## Supplementary Information

### Appendix A

Several methods for calculating stomatal conductance and O<sub>3</sub> deposition velocity from eddy covariance measurements are found in literature (e.g. Wesely and Hicks, 1977; Gerosa et al., 2005; Fares et al., 2010). While we follow the same general approach, we present the methods here for completeness and to point out some particular choices we have made. These expressions are used in Eqs. 1-3. The required input variables are O<sub>3</sub> concentration (mol mol<sup>-1</sup>), temperature (K), pressure (Pa), specific humidity (kg kg<sup>-1</sup>), friction velocity (m s<sup>-1</sup>), sensible and latent heat fluxes (W m<sup>-2</sup>), canopy height (m), and leaf area index (m<sup>2</sup> m<sup>-2</sup>).

The aerodynamic and quasi-laminar layer resistances are calculated from measurements of momentum flux using the Monin-Obukhov similarity relations. For heat, O<sub>3</sub>, and other gases, the aerodynamic resistance ( $r_a$ , s m<sup>-1</sup>) is (Foken, 2017, pp. 219-223)

$$r_a = \frac{1}{ku_*} \left[ \ln \left( \frac{z-d}{z_0} \right) - \psi_H \left( \frac{z-d}{L} \right) + \psi_H \left( \frac{z_0}{L} \right) \right] \quad (\text{A1})$$

where  $r_a$  is evaluated at height  $z$ ,  $u_*$  is the friction velocity,  $z_0$  (m) is the roughness length for momentum,  $d$  (m) is the displacement height,  $k = 0.4$  is the von Karman constant,  $\psi_H(\zeta)$  is the stability function for sensible heat discussed below, and  $L$  is the Obukhov length (m). The roughness and displacement heights are  $z_0 = 0.1z_c$  and  $d = 0.7z_c$ , respectively, where  $z_c$  is the canopy height specific to each site (<http://fluxnet.fluxdata.org/sites/site-summary/>, accessed 24 February 2017). Since canopy heights are not specified for croplands or grasslands in this database, we use a constant canopy height of 1 m for grasslands and typical crop-specific heights for each agricultural site (Weaver and Bruner, 1927). The stability function is (Foken, 2017, pp. 54-62; Högström, 1988)

$$\psi_H(\zeta) = \begin{cases} 2 \ln \left( \frac{1 + 0.95(1 - 11.6\zeta)^{1/2}}{2} \right) & \text{for } \zeta < 0 \\ 1 - \left( 1 + \frac{2}{3}\zeta \right)^{3/2} - b_1 \left( \zeta - \frac{b_2}{b_3} \right) \exp(-b_3\zeta) - \frac{b_1 b_2}{b_3} & \text{for } \zeta \geq 0 \end{cases} \quad (\text{A2})$$

where  $b_1 = 0.667$ ,  $b_2 = 5$ , and  $b_3 = 0.35$ . The form above is appropriate for strongly stable conditions ( $(z-d)/L = \zeta > 1$ ), which occur frequently in the FLUXNET2015 data, as well weak stability (Beljaars and Holtslag, 1991).

The Obukhov length is (Foken, 2017, pp. 54-62)

$$L = - \frac{u_*^3 \theta_v}{kg(\overline{w'\theta_v'})} \quad (\text{A3})$$

where  $\theta_v$  is virtual potential temperature,  $\overline{w'\theta'_v}$  is the vertical flux of virtual potential temperature or buoyancy at the surface, and  $g$  is acceleration due to gravity. For calculations, we expand  $\theta_v$  and  $\overline{w'\theta'_v}$  in terms of measured quantities so

$$L = - \frac{u_*^3 c_p \rho \theta (1 + 0.61q)}{kg(H(1 + 0.61q) + 0.61c_p \theta E)} \quad (\text{A4})$$

where  $c_p$  is specific heat capacity of air ( $\text{J kg}^{-1} \text{K}^{-1}$ ),  $\rho$  is the mass density of air ( $\text{kg m}^{-3}$ ),  $\theta$  is potential temperature (K),  $q$  is specific humidity ( $\text{kg kg}^{-1}$ ),  $H$  is the surface sensible heat flux ( $\text{W m}^{-2}$ ), and  $E$  is the surface moisture flux ( $\text{kg m}^{-2} \text{s}^{-1}$ ).  $H$  and  $E$  are defined positive for upward fluxes.

The quasi-laminar layer resistance for  $\text{O}_3$  and  $\text{H}_2\text{O}$  is (Foken, 2017, pp. 219-223)

$$r_b = \frac{2}{ku_*} \left( \frac{\text{Sc}}{\text{Pr}} \right)^{2/3}, \quad (\text{A5})$$

where  $\text{Sc} = \nu/D$  is the Schmidt number, which is the ratio of kinematic viscosity of air ( $\nu$ ) to the molecular diffusivity of the gas in air ( $D$ ), and  $\text{Pr} = \nu/D_H$  is the Prandtl number, which involves the thermal diffusivity ( $D_H$ ). The conductance for heat is the same as Eq. A5, but uses the thermal diffusivity of air in place of molecular diffusivity.

We calculate stomatal resistance and conductance from the evaporative-resistance form of the Penman-Monteith equation (Monteith, 1981; Gerosa et al., 2007). For water vapor,

$$g_{s,w}^{-1} = r_{s,w} = \frac{\varepsilon \rho (e_s(T_f) - e)}{pE} - (r_a + r_{b,w}) \quad (\text{A6})$$

where  $\varepsilon = 0.622$  is the mass ratio of  $\text{H}_2\text{O}$  and dry air,  $p$  is the air pressure,  $e_s(T_f)$  is the saturation vapor pressure at the transpiring leaf surface with temperature  $T_f$ ,  $e$  is vapor pressure at the flux measurement height, and  $r_{b,w}$  is the quasi-laminar layer resistance to water vapor (Eq. A5). Leaf temperature is not a standard FLUXNET2015 variable, but it can be estimated from sensible heat flux using surface energy balance (Gerosa et al., 2007):

$$T_f = T + \frac{H}{c_p \rho} (r_a + r_{b,H}) \quad (\text{A7})$$

where  $T$  is the air temperature at the measurement height and  $r_{b,H}$  is the quasi-laminar layer resistance to heat (Eq. A5). We initially inverted Monteith's (1981) original equation for evapotranspiration (Eq. 4 in Gerosa et al., 2007) in place of Eq. A6, but the resulting  $g_{s,w}$  estimates were much more noisy. Although the forms are analytically equivalent (Gerosa et al., 2007), inverting the evaporative-resistance form is numerically preferable because it avoids subtractive terms that amplify relative errors and it more accurately treats temperature and pressure effects, particularly the non-linearity in the saturation vapor pressure.

The stomatal conductance of  $\text{O}_3$  is less than water vapor due to its greater molar mass and diffusion against the net gas flow out of the stomatal pore (Marrero and Mason, 1972), so

$$g_s = 0.6 g_{s,w}. \quad (\text{A8})$$

In all equations, we include the temperature and pressure dependences of  $\rho$ ,  $c_p$ ,  $v$ ,  $D$ ,  $D_H$ , and latent heat of vaporization and also the humidity dependence of  $\rho$ ,  $c_p$ , and  $D_H$  using expressions from Jacobson (2005).

## Appendix B

We estimate uncertainties in all derived quantities using standard techniques for propagation of errors (e.g. Taylor, 1997, pp. 73-77). In the following section,  $f$  is a function that depends on variables  $x_1, x_2, \dots, x_n$  that each have uncertainties  $\sigma_{x_1}, \sigma_{x_2}, \dots, \sigma_{x_n}$ . The standard error ( $\sigma_f$ ) in  $f(x_1, x_2, \dots, x_n)$  at time  $i$  is approximately

$$\sigma_{f,i}^2 = \sum_{j=1}^n \left( \frac{\partial f_i}{\partial x_j} \right)^2 \sigma_{x_j,i}^2. \quad (\text{B1})$$

This form neglects covariance between the measurement errors, which is unknown in our case, and is most accurate when  $\sigma_{x_j} \ll x_j$ . We use centered finite differences to calculate numerical derivatives through all equations.

The propagation of errors reveals that  $F'_{s,O_3}$  and other quantities have errors or uncertainties that vary widely from hour to hour. Daily and monthly averages should account for the varying confidence in each value in the average (e.g. Taylor, 1997, pp. 173-177). For values  $f_i$  that are from a single distribution, but have different uncertainties  $\sigma_{f,i}$ , the maximum likelihood estimate of  $f$  is

$$\bar{f} = \left( \sum_{i=1}^m w_i f_i \right) \left( \sum_{i=1}^m w_i \right)^{-1}; \quad w_i = \sigma_{f,i}^{-2}. \quad (\text{B2})$$

The weights  $w_i$  reflect the confidence in value  $f_i$  and the summation is carried out over all times  $m$  within the desired averaging period. The standard error of  $\bar{f}$  is

$$\sigma_{\bar{f}} = \left( \sum_{i=1}^m w_i \right)^{-\frac{1}{2}}. \quad (\text{B3})$$

For averaging across times when  $f$  is expected to change, as during different hours of the day, an unweighted average is more appropriate

$$\bar{f} = \frac{1}{m} \sum_{i=1}^m f_i \quad (\text{B4})$$

and the standard error of  $\bar{f}$ , given by Eq. B1, simplifies to

$$\sigma_{\bar{f}} = \left( \frac{1}{m^2} \sum_{i=1}^m \sigma_{f,i}^2 \right)^{\frac{1}{2}}. \tag{B5}$$

Table S1. Description of FLUXNET2015 Tier 1 sites used in SynFlux.

| Site name           | PFT <sup>1</sup> | Lat <sup>2</sup> | Lon <sup>3</sup> | Clim <sup>4</sup> | Period    | References <sup>5</sup>        |
|---------------------|------------------|------------------|------------------|-------------------|-----------|--------------------------------|
| AT-Neu              | GRA              | 47.1167          | 11.3175          | Unk               | 2002-2012 | (Wohlfahrt et al., 2008)       |
| BE-Bra              | MF               | 51.3092          | 4.5206           | Unk               | 1996-2014 | (Carrara et al., 2004)         |
| BE-Lon              | CRO              | 50.5516          | 4.7461           | Cfb               | 2004-2014 | (Moureaux et al., 2006)        |
| BE-Vie              | MF               | 50.3051          | 5.9981           | Cfb               | 1996-2014 | (Aubinet et al., 2001)         |
| CH-Cha              | GRA              | 47.2102          | 8.4104           | Unk               | 2005-2014 | (Merbold et al., 2014)         |
| CH-Dav              | ENF              | 46.8153          | 9.8559           | Unk               | 1997-2014 | (Zielis et al., 2014)          |
| CH-Fru              | GRA              | 47.1158          | 8.5378           | Unk               | 2005-2014 | (Imer et al., 2013)            |
| CH-Lae              | MF               | 47.4781          | 8.3650           | Unk               | 2004-2014 | (Etzold et al., 2011)          |
| CH-Oe1              | GRA              | 47.2858          | 7.7319           | Unk               | 2002-2008 | (Ammann et al., 2009)          |
| CH-Oe2              | CRO              | 47.2863          | 7.7343           | Unk               | 2004-2014 | (Dietiker et al., 2010)        |
| CZ-BK1              | ENF              | 49.5021          | 18.5369          | Unk               | 2004-2008 | (Acosta et al., 2013)          |
| CZ-BK2              | GRA              | 49.4944          | 18.5429          | Unk               | 2004-2006 | –                              |
| CZ-wet              | WET              | 49.0247          | 14.7704          | Unk               | 2006-2014 | (Dûsek et al., 2012)           |
| DE-Akm              | WET              | 53.8662          | 13.6834          | Cfb               | 2009-2014 | –                              |
| DE-Geb              | CRO              | 51.1001          | 10.9143          | Unk               | 2001-2014 | (Anthoni et al., 2004)         |
| DE-Gri              | GRA              | 50.9500          | 13.5126          | Cfb               | 2004-2014 | (Prescher et al., 2010a)       |
| DE-Hai              | DBF              | 51.0792          | 10.4530          | Unk               | 2000-2012 | (Knohl et al., 2003)           |
| DE-Kli              | CRO              | 50.8931          | 13.5224          | Cfb               | 2004-2014 | (Prescher et al., 2010)        |
| DE-Lkb              | ENF              | 49.0996          | 13.3047          | Unk               | 2009-2013 | (Lindauer et al., 2014)        |
| DE-Obe              | ENF              | 50.7867          | 13.7213          | Cfb               | 2008-2014 | –                              |
| DE-RuR <sup>6</sup> | GRA              | 50.6219          | 6.3041           | Unk               | 2011-2014 | (Post et al., 2015)            |
| DE-RuS <sup>6</sup> | CRO              | 50.8659          | 6.4472           | Cfb               | 2011-2014 | (Mauder et al., 2013)          |
| DE-Seh              | CRO              | 50.8706          | 6.4497           | Unk               | 2007-2010 | (Schmidt et al., 2012)         |
| DE-SfN              | WET              | 47.8064          | 11.3275          | Unk               | 2012-2014 | (Hommeltenberg et al., 2014)   |
| DE-Spw              | WET              | 51.8923          | 14.0337          | Cfb               | 2010-2014 | –                              |
| DE-Tha              | ENF              | 50.9624          | 13.5652          | Cfb               | 1996-2014 | (Grünwald and Bernhofer, 2007) |
| DK-Fou              | CRO              | 56.4842          | 9.5872           | Unk               | 2005-2005 | –                              |
| DK-Sor              | DBF              | 55.4859          | 11.6446          | Unk               | 1996-2014 | (Pilegaard et al., 2011)       |
| ES-LgS              | OSH              | 37.0979          | -2.9658          | Unk               | 2007-2009 | (Reverter et al., 2010)        |
| ES-Ln2              | OSH              | 36.9695          | -3.4758          | Unk               | 2009-2009 | –                              |
| FI-Hyy              | ENF              | 61.8474          | 24.2948          | Unk               | 1996-2014 | (Mammarella et al., 2007)      |
| FI-Jok              | CRO              | 60.8986          | 23.5135          | Unk               | 2000-2003 | (Lohila, 2004)                 |
| FI-Lom              | WET              | 67.9972          | 24.2092          | Unk               | 2007-2009 | –                              |
| FI-Sod              | ENF              | 67.3619          | 26.6378          | Unk               | 2001-2014 | (Thum et al., 2007)            |
| FR-Fon              | DBF              | 48.4764          | 2.7801           | Cfb               | 2005-2014 | (Delpierre et al., 2015)       |
| FR-Gri              | CRO              | 48.8442          | 1.9519           | Cfb               | 2004-2013 | (Loubet et al., 2011)          |
| FR-LBr              | ENF              | 44.7171          | -0.7693          | Unk               | 1996-2008 | (Berbigier et al., 2001)       |
| FR-Pue              | EBF              | 43.7414          | 3.5958           | Unk               | 2000-2014 | (Rambal et al., 2004)          |
| IT-BCi              | CRO              | 40.5238          | 14.9574          | Unk               | 2004-2014 | (Vitale et al., 2015)          |
| IT-CA1              | DBF              | 42.3804          | 12.0266          | Unk               | 2011-2014 | (Sabbatini et al., 2016)       |
| IT-CA2              | CRO              | 42.3772          | 12.0260          | Unk               | 2011-2014 | (Sabbatini et al., 2016)       |
| IT-CA3              | DBF              | 42.3800          | 12.0222          | Unk               | 2011-2014 | (Sabbatini et al., 2016)       |

|        |     |         |           |     |           |                            |
|--------|-----|---------|-----------|-----|-----------|----------------------------|
| IT-Col | DBF | 41.8494 | 13.5881   | Unk | 1996-2014 | (Valentini et al., 1996)   |
| IT-Cp2 | EBF | 41.7043 | 12.3573   | Unk | 2012-2014 | (Fares et al., 2014)       |
| IT-Cpz | EBF | 41.7052 | 12.3761   | Unk | 1997-2009 | (Garbulsky et al., 2008)   |
| IT-Isp | DBF | 45.8126 | 8.6336    | Unk | 2013-2014 | (Ferréa et al., 2012)      |
| IT-La2 | ENF | 45.9542 | 11.2853   | Unk | 2000-2002 | (Marcolla et al., 2003)    |
| IT-Lav | ENF | 45.9562 | 11.2813   | Unk | 2003-2014 | (Marcolla et al., 2003)    |
| IT-MBo | GRA | 46.0147 | 11.0458   | Unk | 2003-2013 | (Marcolla et al., 2011)    |
| IT-Noe | CSH | 40.6061 | 8.1515    | Unk | 2004-2014 | (Papale et al., 2014)      |
| IT-PT1 | DBF | 45.2009 | 9.0610    | Unk | 2002-2004 | (Migliavacca et al., 2009) |
| IT-Ren | ENF | 46.5869 | 11.4337   | Unk | 1998-2013 | (Montagnani et al., 2009)  |
| IT-Ro1 | DBF | 42.4081 | 11.9300   | Unk | 2000-2008 | (Rey et al., 2002)         |
| IT-Ro2 | DBF | 42.3903 | 11.9209   | Unk | 2002-2012 | (Tedeschi et al., 2006)    |
| IT-SR2 | ENF | 43.7320 | 10.2910   | Unk | 2013-2014 | –                          |
| IT-SRo | ENF | 43.7279 | 10.2844   | Unk | 1999-2012 | (Chiesi et al., 2005)      |
| IT-Tor | GRA | 45.8444 | 7.5781    | Unk | 2008-2014 | (Galvagno et al., 2013)    |
| NL-Hor | GRA | 52.2404 | 5.0713    | Unk | 2004-2011 | (Jacobs et al., 2007)      |
| NL-Loo | ENF | 52.1666 | 5.7436    | Unk | 1996-2013 | (Dolman et al., 2002)      |
| RU-Fyo | ENF | 56.4615 | 32.9221   | Unk | 1998-2014 | (Kurbatova et al., 2008)   |
| US-AR1 | GRA | 36.4267 | -99.4200  | Dsa | 2009-2012 | (Raz-Yaseef et al., 2015)  |
| US-AR2 | GRA | 36.6358 | -99.5975  | Dsa | 2009-2012 | (Raz-Yaseef et al., 2015)  |
| US-ARb | GRA | 35.5497 | -98.0402  | Cfa | 2005-2006 | (Raz-Yaseef et al., 2015)  |
| US-ARc | GRA | 35.5465 | -98.0400  | Cfa | 2005-2006 | (Raz-Yaseef et al., 2015)  |
| US-ARM | CRO | 36.6058 | -97.4888  | Cfa | 2003-2012 | (Fischer et al., 2007)     |
| US-Blo | ENF | 38.8953 | -120.6328 | Csa | 1997-2007 | (Goldstein et al., 2000)   |
| US-Cop | GRA | 38.0900 | -109.3900 | Unk | 2001-2007 | (Bowling et al., 2010)     |
| US-GBT | ENF | 41.3658 | -106.2397 | Dfc | 1999-2006 | (Zeller and Nikolov, 2000) |
| US-GLE | ENF | 41.3665 | -106.2399 | Dfc | 2004-2014 | (Frank et al., 2014)       |
| US-Ha1 | DBF | 42.5378 | -72.1715  | Dfb | 1991-2012 | (Urbanski et al., 2007)    |
| US-KS2 | CSH | 28.6086 | -80.6715  | Cwa | 2003-2006 | (Powell et al., 2006)      |
| US-Los | WET | 46.0827 | -89.9792  | Dfb | 2000-2014 | (Sulman et al., 2009)      |
| US-Me1 | ENF | 44.5794 | -121.5000 | Csb | 2004-2005 | (Irvine et al., 2007)      |
| US-Me2 | ENF | 44.4523 | -121.5574 | Csb | 2002-2014 | (Irvine et al., 2008)      |
| US-Me6 | ENF | 44.3233 | -121.6078 | Csb | 2010-2014 | (Ruehr et al., 2012)       |
| US-MMS | DBF | 39.3232 | -86.4131  | Cfa | 1999-2014 | (Dragoni et al., 2011)     |
| US-Myb | WET | 38.0498 | -121.7651 | Csa | 2010-2014 | (Matthes et al., 2014)     |
| US-Ne1 | CRO | 41.1651 | -96.4766  | Dfa | 2001-2013 | (Verma et al., 2005)       |
| US-Ne2 | CRO | 41.1649 | -96.4701  | Dfa | 2001-2013 | (Verma et al., 2005)       |
| US-Ne3 | CRO | 41.1797 | -96.4397  | Dfa | 2001-2013 | (Verma et al., 2005)       |
| US-NR1 | ENF | 40.0329 | -105.5464 | Dfc | 1998-2014 | (Monson et al., 2002)      |
| US-ORv | WET | 40.0201 | -83.0183  | Cfa | 2011-2011 | (Morin et al., 2014)       |
| US-PFa | MF  | 45.9459 | -90.2723  | Dfb | 1995-2014 | (Desai et al., 2015)       |
| US-SRG | GRA | 31.7894 | -110.8277 | Bsk | 2008-2014 | (Scott et al., 2015)       |
| US-SRM | WSA | 31.8214 | -110.8661 | Bsk | 2004-2014 | (Scott et al., 2009)       |
| US-Syv | MF  | 46.2420 | -89.3477  | Dfb | 2001-2014 | (Desai et al., 2005)       |
| US-Ton | WSA | 38.4316 | -120.9660 | Csa | 2001-2014 | (Baldocchi et al., 2010)   |
| US-Tw1 | WET | 38.1074 | -121.6469 | Csa | 2012-2014 | (Oikawa et al., 2017)      |

|        |     |         |           |     |           |                          |
|--------|-----|---------|-----------|-----|-----------|--------------------------|
| US-Tw2 | CRO | 38.1047 | -121.6433 | Csa | 2012-2013 | (Knox et al., 2016)      |
| US-Tw3 | CRO | 38.1159 | -121.6467 | Csa | 2013-2014 | (Baldocchi et al., 2015) |
| US-Tw4 | WET | 38.1030 | -121.6414 | Csa | 2013-2014 | (Baldocchi, 2016)        |
| US-Twt | CRO | 38.1087 | -121.6530 | Csa | 2009-2014 | (Hatala et al., 2012)    |
| US-UMB | DBF | 45.5598 | -84.7138  | Dfb | 2000-2014 | (Gough et al., 2013)     |
| US-UMd | DBF | 45.5625 | -84.6975  | Dfb | 2007-2014 | (Gough et al., 2013)     |
| US-Var | GRA | 38.4133 | -120.9507 | Csa | 2000-2014 | (Ma et al., 2007)        |
| US-WCr | DBF | 45.8059 | -90.0799  | Dfb | 1999-2014 | (Cook et al., 2004)      |
| US-Whs | OSH | 31.7438 | -110.0522 | Bsk | 2007-2014 | (Scott et al., 2015)     |
| US-Wi0 | ENF | 46.6188 | -91.0814  | Dfb | 2002-2002 | (Noormets et al., 2007)  |
| US-Wi3 | DBF | 46.6347 | -91.0987  | Dfb | 2002-2004 | (Noormets et al., 2007)  |
| US-Wi4 | ENF | 46.7393 | -91.1663  | Dfb | 2002-2005 | (Noormets et al., 2007)  |
| US-Wi6 | OSH | 46.6249 | -91.2982  | Dfb | 2002-2003 | (Noormets et al., 2007)  |
| US-Wi9 | ENF | 46.6188 | -91.0814  | Dfb | 2004-2005 | (Noormets et al., 2007)  |
| US-Wkg | GRA | 31.7365 | -109.9419 | Bsk | 2004-2014 | (Scott et al., 2010)     |

<sup>1</sup> Plant functional type; see Table 2 for abbreviations. <sup>2</sup> Positive value indicates north latitude.

<sup>3</sup> Negative value indicates west longitude. <sup>4</sup>Köppen Climate classification. <sup>5</sup> “-” indicates that site operators have not provided a reference. <sup>6</sup> Latent and sensible heat flux uncertainty not reported for this site; 50% uncertainty is assumed.

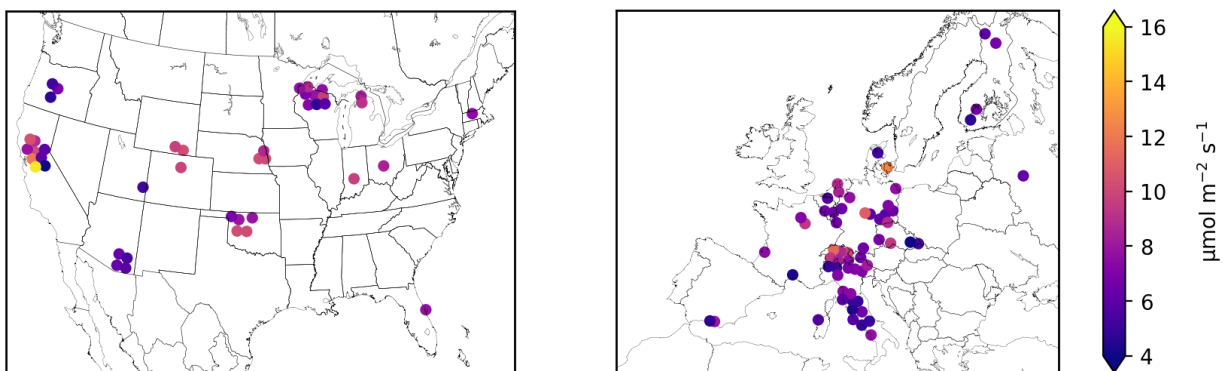

Figure S1. Mean synthetic total  $O_3$  flux ( $F'_{O_3}$ , Sect. 2.1) during the daytime growing season (April-September) at FLUXNET2015 sites in the United States and Europe. Symbols of some sites have been moved slightly to reduce overlap and improve legibility.

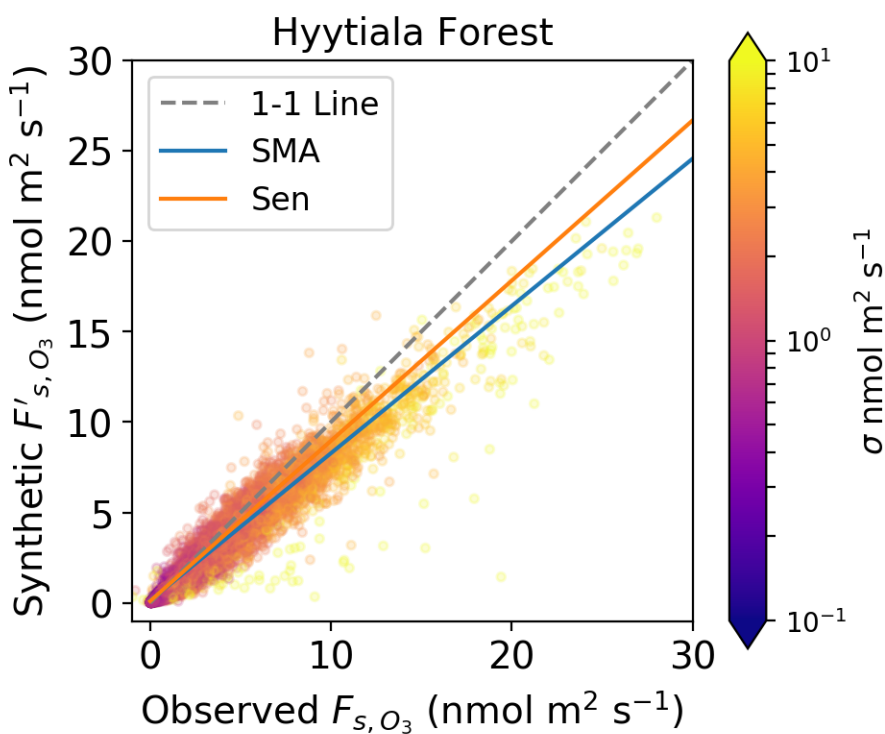

Figure S2. Synthetic and observed stomatal conductance,  $F'_{s,O_3}$ , at Hyytiälä Forest illustrating the errors in half-hourly data. Colors show the standard deviation of each value on a logarithmic scale, as calculated by error propagation.



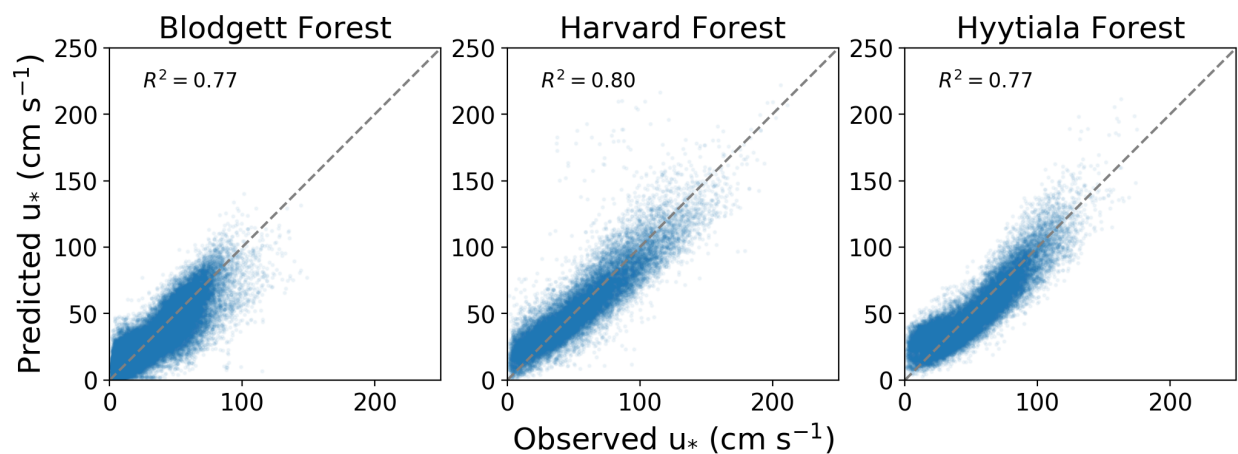

Figure S3. Observed and predicted friction velocity ( $u_*$ ) from the regression model in Sect 2.3.

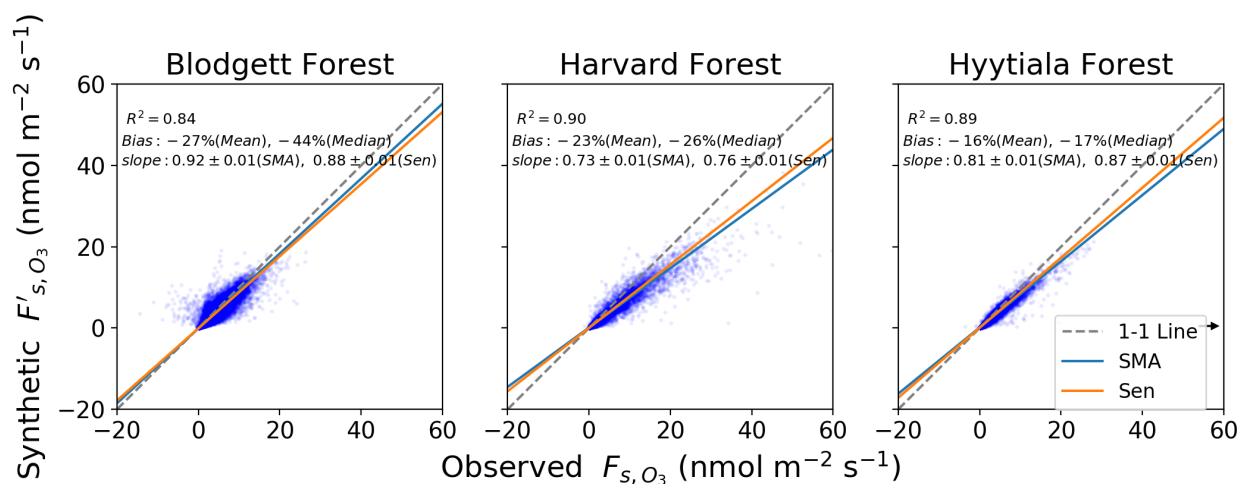

Figure S4. Synthetic and observed half-hourly (hourly at Harvard Forest) stomatal  $O_3$  flux. See Fig. 2 for explanation of lines and inset text.

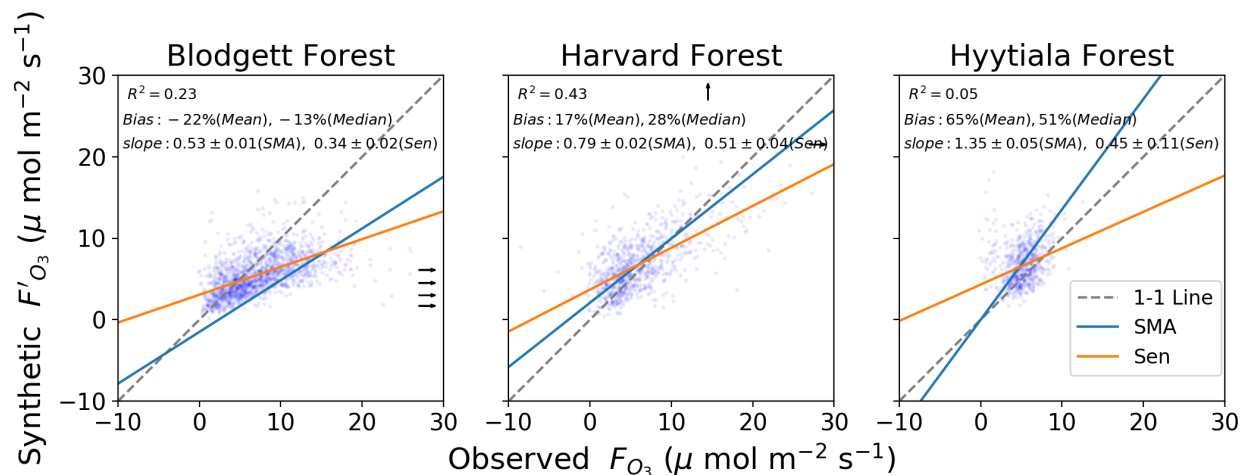

Figure S5. Synthetic and observed daily daytime total O<sub>3</sub> flux ( $F'_{O_3}$ , Sect. 2.1). See Sect. 2.1 for explanation of  $F'_{O_3}$  and Fig. 2 for explanation of lines and inset text.

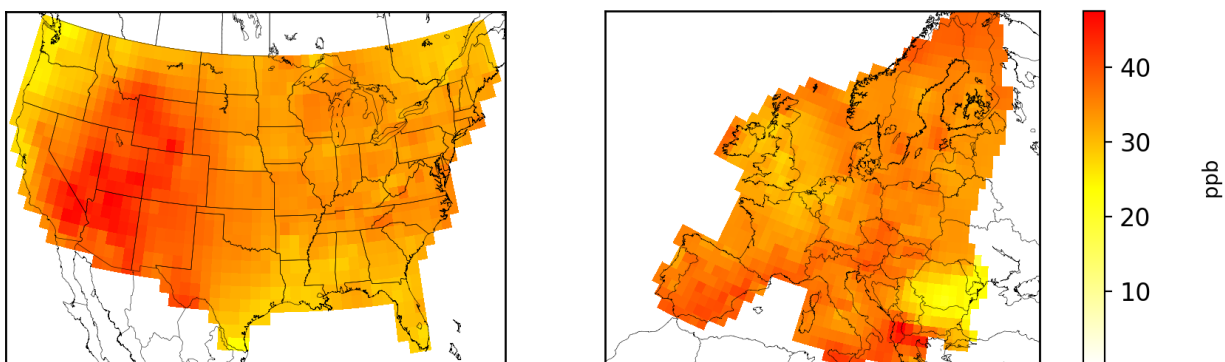

Figure S6. Mean daytime (8:00am-8:00pm local) O<sub>3</sub> concentrations for the US and Europe during the growing season (April-September) for 2000-2014. Data from Schnell et al. (2014).

CUO3

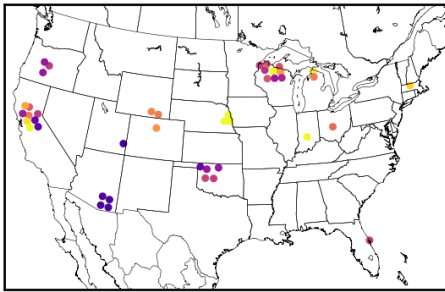

CUO3

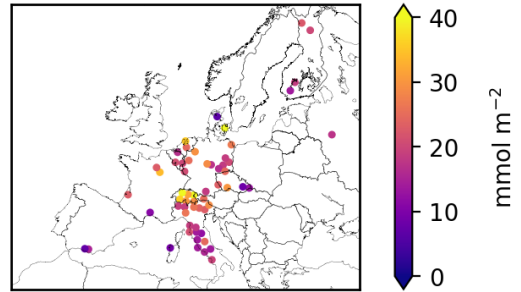

CUO

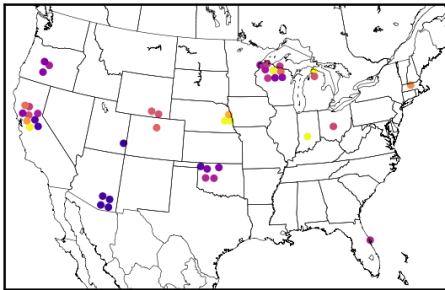

CUO

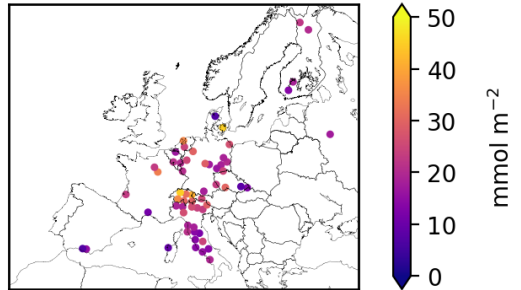

O<sub>3</sub>

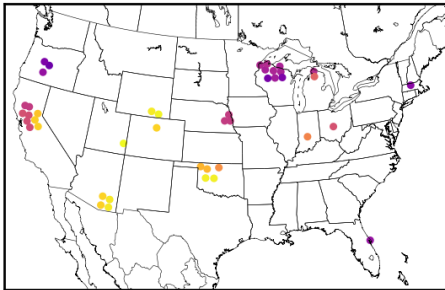

O<sub>3</sub>

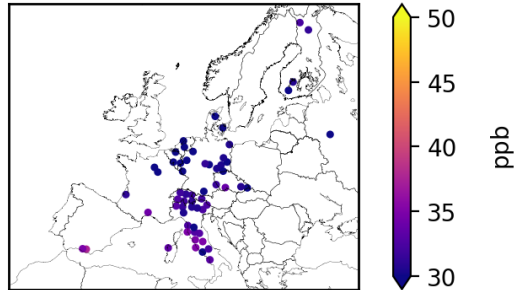

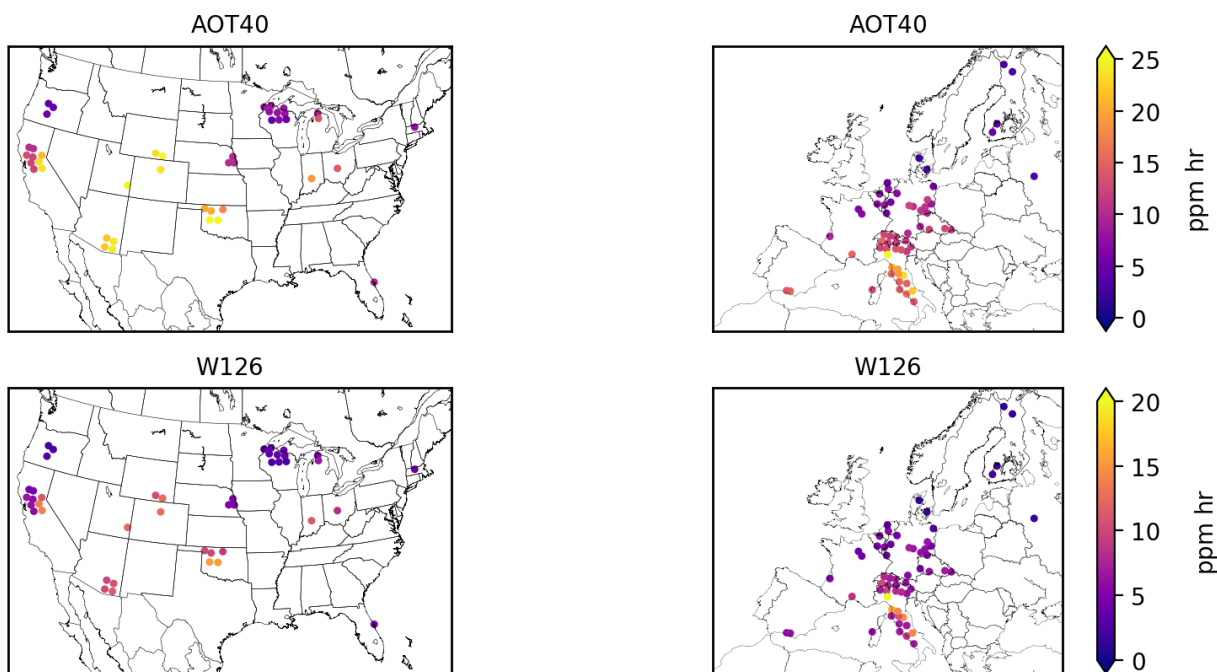

Figure S7. Metrics of plant exposure to  $O_3$  at FLUXNET2015 sites in the US and Europe:  $POD_3$ ,  $CUO$ , mean  $O_3$ , AOT40, and W126. See Sect. 3.4 for metric definitions.
